# Supplementary material
Source: ML conference proceedings conference paper supplement (https://openaccess.thecvf.com/content/ICCV2025/html/Caetano_DisCoPatch_Taming_Adversarially-driven_ICCV_2025_paper.html)
Supplement: Supplementary file 1 [file Caetano_DisCoPatch_Taming_Adversarially-driven_ICCV_2025_supplemental.pdf]

# DisCoPatch: Taming Adversarially-driven Batch Statistics for Improved Out-of-Distribution Detection

## Supplementary Material

The supplementary material is organized as follows: Appendix A covers the datasets used in this work. Appendix B describes the implementation details of DisCoPatch while Appendix C covers the compute resources required for training and evaluating the models. Appendix D presents the results of the experiments on Batch normalization bias in conventional setups. Appendix E covers the impact of alternative normalization layers in the discriminator performance. Appendix F analyses in more detail the effect that multiple patch counts have on DisCoPatch’s performance. Appendix G provides detailed results on the ImageNet-1K Covariate Shift OOD detection benchmark.

### A. Data Availability

*ImageNet-1K* [51] contains 1000 classes. For the Near-OOD experiments in this paper, we have employed the SSB-hard [59] and NINCO [3] datasets. In the case of Far-OOD, we have used iNaturalist [22], DTD [6], and OpenImage-O [61]. The experiments in the Covariate Shift section are evaluated in the ImageNet-1K(-C) [18] dataset. The OOD benchmark used to evaluate and compare the selected models closely follows the one proposed in OpenOOD by [70]. The images are resized to  $256 \times 256$  before being fed to DisCoPatch.

The dataset ImageNet-1K(-C) was downloaded from its source <sup>2</sup>. Additionally, we have also used the original and publicly available splits for ImageNet-1K <sup>3</sup>. The remaining datasets and files containing training and evaluation splits were downloaded from OpenOOD’s publicly available repository <sup>4</sup>. For convenience, DisCoPatch’s repository includes the split files and a script that automatically downloads these datasets.

### B. Implementation Details

DisCoPatch (our proposed method) is an Adversarial VAE, which is composed of a VAE and a Discriminator. The VAE features an Encoder ( $\mathcal{E}_{\theta_E}$ ), consisting of convolutional layers with a kernel size of 3, stride 2, padding 1, and output padding of 1. All the convolution layers are followed by BN and a LeakyReLU activation function. The number of filters doubles with each layer. Encoded features are then flattened and passed through two distinct fully connected

---

#### Algorithm 1 Training algorithm of DisCoPatch.

---

```

Initialize parameters of models  $\theta, \phi$ 
while training do
     $x^{real} \leftarrow$  patches of images from dataset
     $z_{\mu}^{real}, z_{\sigma}^{real} \leftarrow \mathcal{E}_{\theta_E}(x^{real})$ 
     $z^{real} \leftarrow z_{\mu}^{real} + \epsilon_{real} z_{\sigma}^{real}$  with  $\epsilon_{real} \sim \mathcal{N}(0, \mathbf{I})$ 
     $x^{rec} \leftarrow \mathcal{G}_{\theta_G}(z^{real})$ 
     $z^{fake} \leftarrow \epsilon_{fake}$  with  $\epsilon_{fake} \sim \mathcal{N}(0, \mathbf{I})$ 
     $x^{fake} \leftarrow \mathcal{G}_{\theta_G}(z^{fake})$ 
     $x^{rec} \leftarrow \mathcal{G}_{\theta_G}(z^{real})$ 
     $D^{real} \leftarrow \mathcal{D}_{\phi}(x^{rec})$ 
     $D^{rec}, D^{fake} \leftarrow \mathcal{D}_{\phi}(x^{rec}), \mathcal{D}_{\phi}(x^{fake})$ 

     $\theta \leftarrow \nabla_{\theta} \mathcal{L}_{VAE}(\theta)$ 
     $\phi \leftarrow \nabla_{\phi} \mathcal{L}_D(\phi)$ 
end while

```

---

layers, one estimating  $z_{\mu}$  and the other  $z_{\sigma}$ , with outputs the size of the latent dimension. These outputs undergo the reparametrization trick to generate  $z$ , which is then fed into the VAE’s decoder, referred to as the Generator ( $\mathcal{G}_{\theta_G}$ ). The Generator comprises transposed convolutions, followed by BN and a LeakyReLU activation, with the same kernel size, stride, padding, and output padding as the Encoder. The number of filters halves after each layer. A final convolutional layer with a kernel size of 3 and padding of 1, followed by a Tanh activation, generates the final output image. The generated image is subsequently fed into a Discriminator ( $\mathcal{D}_{\phi}$ ). The Discriminator shares the same architecture as the Encoder but replaces the two fully connected layers with a single one that generates an output of size 1, followed by a Sigmoid activation. Additionally, for its recommended setup, `track_running_stats` is set to `False` in the Discriminator. The training process is covered in detail in Subsection 3.2, but can be summarized by Algorithm 1.

Table 2. Hyperparameters used for DisCoPatch’s training.

| Model     | Lat. Dim. | Hidden Dimensions           | lr          |
|-----------|-----------|-----------------------------|-------------|
| Full-Size | 1024      | 32, 64, 128, 256, 512, 1024 | $5e^{-5}$   |
| Patches   | 1024      | 128, 256, 512, 1024         | $8.5e^{-5}$ |

DisCoPatch is optimized using the Adam optimizer, with  $\beta_1 = 0.9$  and  $\beta_2 = 0.999$ . Both models share the same learning rate, *lr*. As shown in Equation 6, three weighing

<sup>2</sup><https://github.com/hendrycks/robustness>

<sup>3</sup><https://huggingface.co/datasets/benjamin-paine/imagenet-1k-256x256>

<sup>4</sup><https://github.com/jing kang50/openood>

terms are required to train the model; these were fixed for all datasets, with  $\omega_{KL} = 1e^{-4}$ ,  $\omega_{Rec} = 1e^{-3}$  and  $\omega_{Gen} = 1e^{-3}$ . Additional hyperparameters can be found in Table 2. The developed code is based on a publicly available repository<sup>5</sup>. The referred repository is released under the Apache 2.0 License.

## C. Compute Resources

This appendix describes the computational resources employed for inference in the selected models and to train DisCoPatch.

### C.1. Training

DisCoPatch was trained on ImageNet-1K using a system equipped with an NVIDIA H100 Tensor Core GPU (94 GB VRAM), a 32-core, 64-thread AMD EPYC 9334 CPU, and 768 GB RAM. More information can be found in Table 3.

Table 3. Summary of the compute resources required for training the DisCoPatch models on ImageNet-1K.

| Model     | #Patches | Batch Size | Epochs | Parameters | Time (s) |
|-----------|----------|------------|--------|------------|----------|
| Full-Size | 1        | 660        | 70     | 69,240,517 | 111,471  |
| Patches   | 48       | 67         | 30     | 69,118,340 | 94,323   |

### C.2. Inference

To measure the models’ latency, we fed them 1000 individual inputs and calculated the average inference time per image. Table 4 reveals DisCoPatch has the lowest latency. Although MobileNetV2 is smaller, it takes  $224 \times 224$  inputs, whereas DisCoPatch processes an image as a batch of  $64 \times 64$  patches. Latency was measured on a machine with an NVIDIA RTX4070 GPU (8 GB VRAM), an 8-core, 16-thread AMD RYZEN 9 8945HS CPU, and 32 GB RAM.

Table 4. Latency of the tested models.

| Model                   | #Parameters      | Latency (ms) |
|-------------------------|------------------|--------------|
| MOODv2 (BEiTv2)         | 86,530,984       | 19.26        |
| SCALE (ResNet-50)       | 25,557,032       | 11.27        |
| NNGuide (RegNet)        | 83,590,140       | 31.00        |
| NNGuide (ResNet-50)     | 25,557,032       | 11.10        |
| NNGuide (MobileNetv2)   | <b>3,504,872</b> | 9.40         |
| RankFeat (ResNetv2-101) | 44,549,160       | 15.05        |
| ASH (ResNet-50)         | 25,557,032       | 11.15        |
| FDBD (ResNet-50)        | 25,557,032       | 11.17        |
| DisCoPatch-64           | 6,218,753        | <b>1.56</b>  |

## D. Batch Normalization Bias

Table 5 reveals a critical limitation in the model’s behavior when evaluated with the BatchNorm employed in its

standard *evaluation mode*: the model fails to distinguish between ID and OOD samples reliably. In contrast, when disabling the use of the learned statistics and instead using batch-specific statistics, the model’s performance improves significantly, even with a batch size of 1. This effect demonstrates that the running statistics acquired during training are ineffective for discriminating ID from OOD, while the *test* batch statistics provide more discriminating power for detecting OOD samples. It should be noted that as the batch size increases, this improvement becomes more pronounced, which indicates that the model has developed a dependency/shortcut on batch-specific statistics, instead of leveraging the running mean and variance acquired during training. This means that the use of BatchNorm’s running statistics compromises robustness, as it has been observed in adversarial and OOD scenarios [1, 62].

Table 5. OOD detection performance, reported as AU-ROC/FPR95, of a DisCoPatch model trained on complete ImageNet-1k images. Legend: BS = Batch Size.

| Mode               |        | Near-OOD         | Far-OOD          |
|--------------------|--------|------------------|------------------|
| Learned Statistics |        | 38.4/98.0        | 34.5/98.1        |
| Batch Statistics   | BS=1   | 64.9/87.4        | 70.9/71.2        |
|                    | BS=16  | 90.2/55.5        | 91.1/40.0        |
|                    | BS=32  | 95.7/28.6        | 93.4/36.2        |
|                    | BS=64  | 99.3/2.2         | 96.1/23.8        |
|                    | BS=128 | 99.8/0.3         | 97.4/17.0        |
|                    | BS=256 | <b>100.0/0.0</b> | <b>98.1/12.5</b> |

It is important to note that in the configuration employed for this experiment, each batch contains exclusively ID or OOD samples. This means that a single anomaly score predicted for an image by the *Batch Statistics* mode is dependent on the statistics from every image in the batch. This design constraint limits the suitability of this configuration for multiple applications because it requires that all images in a batch share the same class type. A practical and effective solution to ensure this homogeneity without prior class knowledge is by constructing each batch from patches of the same image.

## E. Alternative Normalization Layers

To better demonstrate the effect of the BatchNorm layer and batch statistics, we replaced BatchNorm with GroupNorm and InstanceNorm and retrained DisCoPatch. As shown in Table 6, GroupNorm performs the worst, while InstanceNorm shows intermediate results. These findings suggest that avoiding normalization across multiple channels is beneficial. However, BatchNorm consistently achieves the best performance, particularly under Covariate Shift, highlighting the importance of batch-level statistics.

<sup>5</sup><https://github.com/AntixK/PyTorch-VAE>

Table 6. Comparison between different normalization layers on DisCoPatch. The results correspond to the 64-patch configuration.

| Normalization | Near-OOD                    | Far-OOD                     | Covariate Shift OOD          |
|---------------|-----------------------------|-----------------------------|------------------------------|
| GroupNorm     | 85.0                        | 81.0                        | 78.5                         |
| InstanceNorm  | 92.8                        | 93.7                        | 86.2                         |
| BatchNorm     | <b>95.1</b> <sup>+2.3</sup> | <b>96.6</b> <sup>+2.9</sup> | <b>97.2</b> <sup>+11.0</sup> |

## F. Patch Count Impact

Table 7 shows that the use of more patches improves the detection accuracy, reaching a plateau around 64 patches.

Table 7. OOD detection results on ImageNet-1K for multiple patch counts.

| Model                        | Near-OOD                    | Far-OOD              | Covar. Shift OOD            |
|------------------------------|-----------------------------|----------------------|-----------------------------|
| MOODv2 (BEiTv2)              | 88.9                        | 97.1                 | 70.5                        |
| SCALE (ResNet-50)            | 81.4                        | 96.5                 | 83.3                        |
| NNGuide (RegNet)             | 89.2                        | <b>97.8</b>          | 78.5                        |
| RankFeat [57] (ResNetv2-101) | 89.7                        | 94.5                 | <b>91.9</b>                 |
| ASH [7] (ResNet-50)          | 78.6                        | 96.1                 | 84.7                        |
| FDBD [29] (ResNet-50)        | 74.9                        | 95.8                 | 82.2                        |
| DisCoPatch-4 (Proposed)      | 90.3 <sup>+0.6</sup>        | 92.6 <sup>-5.2</sup> | 93.0 <sup>+1.1</sup>        |
| DisCoPatch-16 (Proposed)     | 94.3 <sup>+4.6</sup>        | 96.0 <sup>-1.8</sup> | 96.5 <sup>+3.6</sup>        |
| DisCoPatch-32 (Proposed)     | 94.8 <sup>+5.1</sup>        | 96.4 <sup>-1.4</sup> | 96.9 <sup>+4.0</sup>        |
| DisCoPatch-64 (Proposed)     | 95.1 <sup>+5.4</sup>        | 96.6 <sup>-1.2</sup> | 97.2 <sup>+4.3</sup>        |
| DisCoPatch-128 (Proposed)    | 95.2 <sup>+5.5</sup>        | 96.7 <sup>-1.1</sup> | 97.3 <sup>+4.4</sup>        |
| DisCoPatch-512 (Proposed)    | <b>95.3</b> <sup>+5.6</sup> | 96.8 <sup>-1.0</sup> | <b>97.4</b> <sup>+4.5</sup> |

## G. Covariate Shift Results on ImageNet-1K

This appendix contains the performance metrics per corruption achieved on the Covariate Shift OOD benchmark.

### G.1. MOODv2 (BEiTv2)

MOODv2 obtains its best results for corruptions that filter high-frequency components. Table 8 shows that it scores very low for Intensity 1 in all corruption tests.

Table 8. Covariate shift OOD benchmark for MOODv2.

| Corruption        | Corruption Intensity |           |           |           |           | Average   |
|-------------------|----------------------|-----------|-----------|-----------|-----------|-----------|
|                   | 1                    | 2         | 3         | 4         | 5         |           |
| Brightness        | 54.2/93.8            | 55.2/93.2 | 56.9/92.2 | 59.2/90.6 | 62.2/88.2 | 57.5/91.6 |
| Contrast          | 59.6/91.6            | 61.7/90.4 | 66.1/87.7 | 77.5/76.6 | 86.4/54.9 | 70.3/80.2 |
| Defocus Blur      | 69.6/80.3            | 76.0/70.7 | 85.5/51.0 | 91.8/33.9 | 95.4/21.0 | 83.7/51.4 |
| Elastic Transform | 60.2/88.5            | 75.9/62.7 | 63.2/85.1 | 70.8/75.3 | 87.1/44.2 | 71.4/71.1 |
| Fog               | 70.0/82.5            | 77.3/71.5 | 89.2/40.0 | 93.3/25.6 | 97.0/11.4 | 85.3/46.2 |
| Frost             | 61.8/88.8            | 70.3/79.9 | 75.6/71.7 | 77.1/69.7 | 80.0/63.5 | 72.9/74.7 |
| Glass Blur        | 60.6/90.6            | 72.1/78.0 | 81.6/62.0 | 88.9/44.4 | 96.5/17.6 | 79.9/58.5 |
| Gaussian Blur     | 58.0/90.0            | 60.0/87.7 | 64.8/82.8 | 71.5/74.1 | 80.3/59.0 | 66.9/78.7 |
| Gaussian Noise    | 63.2/86.3            | 70.2/77.8 | 83.9/51.0 | 87.9/41.4 | 93.3/26.5 | 79.7/56.6 |
| Impulse Noise     | 57.2/89.8            | 60.4/86.8 | 63.6/83.5 | 71.0/74.6 | 78.9/61.6 | 66.2/79.3 |
| JPEG Compression  | 63.5/88.0            | 65.9/85.7 | 67.6/83.8 | 71.9/77.6 | 77.5/68.5 | 69.2/80.7 |
| Motion Blur       | 58.7/90.2            | 63.1/85.9 | 70.5/77.0 | 80.0/61.0 | 85.8/48.5 | 71.6/72.5 |
| Pixelate          | 55.8/92.2            | 57.5/90.9 | 61.0/87.9 | 67.7/81.0 | 83.8/57.1 | 65.2/81.8 |
| Saturate          | 54.0/93.4            | 55.6/92.2 | 55.4/93.1 | 60.3/90.0 | 65.2/85.2 | 58.1/90.8 |
| Shot Noise        | 58.3/89.7            | 61.0/86.8 | 65.3/82.1 | 73.7/70.7 | 80.1/59.1 | 67.7/77.7 |
| Snow              | 62.3/87.4            | 70.8/77.8 | 70.7/78.9 | 75.6/71.4 | 77.2/67.7 | 71.3/76.6 |
| Spatter           | 55.3/92.9            | 59.1/90.2 | 62.0/87.8 | 64.2/85.7 | 69.4/80.0 | 62.0/87.3 |
| Speckle Noise     | 57.6/90.4            | 59.1/88.8 | 63.9/83.7 | 67.4/79.3 | 72.3/72.0 | 64.1/82.8 |
| Zoom Blur         | 65.8/83.7            | 71.9/75.5 | 76.7/67.1 | 81.3/58.3 | 86.5/46.2 | 76.5/66.1 |
| <b>Average</b>    | 60.3/88.9            | 65.4/82.8 | 69.7/76.2 | 75.3/67.4 | 81.8/54.3 | 70.5/73.9 |

### G.2. SCALE (ResNet-50)

The results in Table 9 demonstrate a drop in performance for Intensity 2 in some corruptions that dampen the high-frequency components, such as blurs. This occurs despite good performance on intensity 1.

Table 9. Covariate shift OOD benchmark for SCALE.

| Corruption        | Corruption Intensity |           |           |           |           | Average   |
|-------------------|----------------------|-----------|-----------|-----------|-----------|-----------|
|                   | 1                    | 2         | 3         | 4         | 5         |           |
| Brightness        | 60.1/90.3            | 61.2/89.7 | 63.9/88.0 | 68.3/84.8 | 74.1/79.0 | 65.5/86.4 |
| Contrast          | 74.5/76.9            | 80.3/67.7 | 88.6/48.6 | 98.1/9.6  | 99.9/0.3  | 88.3/40.6 |
| Defocus Blur      | 82.3/63.6            | 87.3/52.4 | 93.9/31.5 | 97.1/15.5 | 98.8/6.1  | 91.9/33.8 |
| Elastic Transform | 71.1/80.3            | 82.5/62.5 | 81.3/62.9 | 87.9/46.7 | 95.0/19.8 | 83.6/54.4 |
| Fog               | 83.4/53.9            | 73.1/79.0 | 77.6/72.7 | 83.2/62.3 | 86.9/53.1 | 80.8/64.2 |
| Frost             | 93.7/29.9            | 72.5/80.0 | 85.2/59.6 | 91.3/41.1 | 92.2/38.0 | 87.0/49.7 |
| Gaussian Blur     | 94.7/26.8            | 74.6/76.3 | 85.0/57.8 | 92.3/36.9 | 96.1/20.9 | 88.6/43.7 |
| Gaussian Noise    | 99.1/4.3             | 66.8/86.4 | 76.0/77.3 | 87.7/54.1 | 95.8/21.9 | 85.1/48.8 |
| Glass Blur        | 99.3/3.5             | 82.4/62.0 | 89.9/43.1 | 97.2/14.7 | 98.2/9.4  | 93.4/26.5 |
| Impulse Noise     | 99.0/4.7             | 75.6/77.7 | 83.2/65.6 | 89.0/50.0 | 96.7/16.9 | 88.7/43.0 |
| JPEG Compression  | 99.2/3.5             | 70.7/81.0 | 73.0/78.6 | 74.8/76.6 | 81.3/67.8 | 79.8/61.5 |
| Motion Blur       | 89.1/48.9            | 73.7/78.0 | 81.6/66.5 | 90.9/43.5 | 96.6/18.2 | 86.4/51.0 |
| Pixelate          | 98.3/8.3             | 65.0/86.9 | 64.9/87.1 | 79.5/70.6 | 89.6/46.3 | 79.4/59.8 |
| Saturate          | 93.4/32.2            | 65.3/86.9 | 64.1/88.6 | 61.4/89.6 | 68.4/85.2 | 70.5/76.5 |
| Shot Noise        | 76.0/77.3            | 68.0/85.2 | 77.8/74.1 | 88.0/52.3 | 96.5/17.8 | 81.3/61.3 |
| Snow              | 98.7/6.5             | 73.0/80.2 | 88.5/50.2 | 85.8/59.7 | 91.5/40.8 | 87.5/47.5 |
| Spatter           | 95.2/24.7            | 61.5/89.4 | 69.2/83.6 | 76.3/75.5 | 79.0/70.4 | 76.2/68.7 |
| Speckle Noise     | 84.1/58.1            | 66.8/85.9 | 70.9/82.3 | 83.7/63.0 | 89.5/47.3 | 79.0/67.3 |
| Zoom Blur         | 94.2/29.0            | 81.9/64.0 | 87.3/51.2 | 90.4/42.3 | 93.0/32.9 | 89.3/43.9 |
| <b>Average</b>    | 88.7/38.0            | 72.7/77.4 | 79.0/66.8 | 85.4/52.0 | 90.5/36.4 | 83.3/54.1 |

### G.3. NNGuide (RegNet)

NNGuide surpasses the performance of MOODv2, as demonstrated by the results in Table 10, particularly for higher corruption intensities. Nonetheless, it also suffers from significantly low scores at Intensity 1.

Table 10. Covariate shift OOD benchmark for NNGuide (RegNet).

| Corruption        | Corruption Intensity |           |           |           |           | Average   |
|-------------------|----------------------|-----------|-----------|-----------|-----------|-----------|
|                   | 1                    | 2         | 3         | 4         | 5         |           |
| Brightness        | 57.9/91.7            | 59.8/90.9 | 62.8/89.2 | 67.3/85.7 | 73.0/79.8 | 64.2/87.5 |
| Contrast          | 75.8/76.1            | 82.3/64.5 | 91.4/37.9 | 98.7/6.1  | 99.9/0.4  | 89.6/37.0 |
| Defocus Blur      | 72.1/75.6            | 78.1/66.0 | 87.9/43.9 | 93.7/26.2 | 96.9/14.2 | 85.7/45.2 |
| Elastic Transform | 66.2/84.8            | 78.0/66.5 | 73.4/75.0 | 82.7/57.8 | 94.6/23.5 | 79.0/61.5 |
| Fog               | 75.9/75.9            | 81.2/66.3 | 88.2/48.5 | 91.7/37.3 | 96.1/19.6 | 86.6/49.5 |
| Frost             | 70.8/81.4            | 81.7/64.0 | 87.8/49.1 | 88.7/46.7 | 91.6/37.0 | 84.1/55.6 |
| Gaussian Blur     | 64.0/86.4            | 75.0/71.3 | 83.9/54.6 | 90.0/38.8 | 96.7/15.2 | 81.9/53.3 |
| Gaussian Noise    | 64.0/86.6            | 70.3/79.9 | 80.5/63.8 | 90.8/37.6 | 98.0/9.5  | 80.7/55.5 |
| Glass Blur        | 71.2/77.9            | 80.3/62.8 | 93.4/27.2 | 95.7/18.6 | 97.4/11.5 | 87.6/39.6 |
| Impulse Noise     | 62.2/87.3            | 68.2/80.9 | 74.2/72.8 | 87.4/46.2 | 96.6/15.7 | 77.7/60.6 |
| JPEG Compression  | 60.9/89.0            | 63.7/86.7 | 65.9/84.9 | 71.7/78.3 | 78.8/68.0 | 68.2/81.4 |
| Motion Blur       | 62.6/86.7            | 69.0/79.6 | 79.3/63.5 | 89.4/39.7 | 93.9/25.3 | 78.8/59.0 |
| Pixelate          | 62.3/88.5            | 63.8/87.1 | 68.1/82.4 | 75.4/72.1 | 82.1/60.2 | 70.3/78.0 |
| Saturate          | 61.3/89.7            | 62.9/88.2 | 58.5/91.6 | 68.7/84.7 | 77.7/72.1 | 65.8/85.2 |
| Shot Noise        | 66.0/85.1            | 72.9/76.8 | 81.1/62.0 | 92.7/30.6 | 97.3/12.3 | 82.0/53.4 |
| Snow              | 69.6/82.5            | 80.9/64.4 | 80.1/65.5 | 86.4/51.1 | 91.0/37.5 | 81.6/60.2 |
| Spatter           | 62.1/89.4            | 67.7/85.7 | 70.5/82.3 | 74.7/78.2 | 81.6/66.4 | 71.3/80.4 |
| Speckle Noise     | 63.8/87.4            | 66.8/84.4 | 76.6/70.4 | 82.5/58.4 | 89.2/41.3 | 75.8/68.4 |
| Zoom Blur         | 70.1/79.0            | 76.7/69.1 | 82.7/57.8 | 86.5/48.6 | 90.4/38.0 | 81.3/58.5 |
| <b>Average</b>    | 66.3/84.3            | 72.6/75.5 | 78.2/64.3 | 85.0/49.6 | 90.7/34.1 | 78.5/61.6 |

## G.4. NNGuide (ResNet-50)

The behavior observed for this backbone of NNGuide in Table 11 is very similar to the one observed when the RegNet was used. However, it is slightly more effective than the bigger backbone at Covariate Shift detection.

Table 11. Covariate shift OOD benchmark for NNGuide (ResNet-50).

| Corruption        | Corruption Intensity |                  |                  |                  |                  | Average          |
|-------------------|----------------------|------------------|------------------|------------------|------------------|------------------|
|                   | 1                    | 2                | 3                | 4                | 5                |                  |
| Brightness        | 56.5/90.0            | 58.8/88.5        | 62.7/85.6        | 68.3/80.5        | 74.7/72.6        | 64.2/83.4        |
| Contrast          | 54.1/91.3            | 61.9/86.2        | 75.0/72.1        | 93.3/27.8        | 99.2/3.0         | 76.7/56.1        |
| Defocus Blur      | 74.7/69.2            | 81.2/57.6        | 90.3/36.5        | 94.7/22.6        | 97.2/13.0        | 87.6/39.8        |
| Elastic Transform | 64.8/83.3            | 80.4/65.4        | 77.6/66.9        | 86.4/51.0        | 95.7/22.1        | 81.0/57.7        |
| Fog               | 69.5/79.0            | 74.6/73.2        | 80.7/63.9        | 84.5/55.3        | 92.2/32.8        | 80.3/60.8        |
| Frost             | 71.7/73.9            | 84.8/49.8        | 91.0/33.4        | 91.7/31.0        | 94.2/22.7        | 86.7/42.2        |
| Gaussian Blur     | 50.3/93.5            | 65.9/81.8        | 77.6/67.9        | 85.9/51.7        | 94.7/23.6        | 74.9/63.7        |
| Gaussian Noise    | 66.2/82.5            | 74.4/73.1        | 84.9/53.6        | 93.8/27.1        | 98.6/6.4         | 83.6/48.5        |
| Glass Blur        | 76.6/68.1            | 86.4/47.7        | 96.1/16.5        | 97.6/10.5        | 98.6/6.2         | 91.1/29.8        |
| Impulse Noise     | 78.1/67.9            | 82.3/61.0        | 85.9/52.5        | 93.8/27.6        | 98.3/8.2         | 87.7/43.5        |
| JPEG Compression  | 63.4/84.7            | 66.6/81.5        | 69.3/78.4        | 77.6/66.5        | 87.2/46.5        | 72.8/71.5        |
| Motion Blur       | 69.3/76.6            | 78.8/62.3        | 88.7/41.2        | 94.9/22.1        | 97.0/14.0        | 85.7/43.2        |
| Pixelate          | 63.3/86.5            | 65.2/84.9        | 75.6/71.9        | 86.9/48.2        | 92.2/32.1        | 76.7/64.7        |
| Saturate          | 47.3/96.3            | 49.9/95.2        | 45.5/96.9        | 57.2/94.6        | 66.5/91.2        | 53.3/94.8        |
| Shot Noise        | 68.1/80.7            | 77.2/69.5        | 86.1/51.7        | 95.0/23.1        | 97.9/10.3        | 84.9/47.1        |
| Snow              | 74.9/74.5            | 89.2/42.3        | 87.6/48.4        | 92.8/31.5        | 95.2/21.5        | 87.9/43.7        |
| Spatter           | 43.5/97.1            | 55.6/95.7        | 65.0/93.6        | 71.2/91.4        | 78.2/87.1        | 62.7/93.0        |
| Speckle Noise     | 52.0/95.1            | 57.2/93.2        | 71.5/84.2        | 78.6/75.7        | 85.4/62.5        | 68.9/82.2        |
| Zoom Blur         | 77.2/68.8            | 83.4/57.8        | 87.6/47.8        | 90.5/39.5        | 92.9/31.3        | 86.3/49.0        |
| <b>Average</b>    | <b>64.3/82.0</b>     | <b>72.3/71.9</b> | <b>78.9/61.2</b> | <b>86.0/46.2</b> | <b>91.4/32.0</b> | <b>78.6/58.7</b> |

## G.5. NNGuide (MobileNet)

The behavior observed for this backbone of NNGuide in Table 12 is very similar to the one observed when the RegNet and ResNet were used. Its performance is lower than the one achieved by the other backbones but by a small margin.

Table 12. Covariate shift OOD benchmark for NNGuide (MobileNet).

| Corruption        | Corruption Intensity |                  |                  |                  |                  | Average          |
|-------------------|----------------------|------------------|------------------|------------------|------------------|------------------|
|                   | 1                    | 2                | 3                | 4                | 5                |                  |
| Brightness        | 52.6/94.1            | 54.0/93.6        | 56.6/92.7        | 60.8/90.7        | 66.0/87.2        | 58.0/91.7        |
| Contrast          | 55.9/93.0            | 58.3/91.7        | 62.9/88.2        | 76.5/70.7        | 91.6/32.5        | 69.1/75.2        |
| Defocus Blur      | 68.2/82.8            | 76.3/71.5        | 88.6/44.7        | 94.4/24.5        | 96.8/14.7        | 84.9/47.6        |
| Elastic Transform | 58.2/92.1            | 73.6/79.3        | 70.5/84.0        | 80.8/71.2        | 90.9/48.9        | 74.8/75.1        |
| Fog               | 59.1/92.1            | 62.6/90.2        | 69.5/84.0        | 75.9/74.6        | 87.1/51.2        | 70.8/78.4        |
| Frost             | 63.8/89.7            | 76.5/77.6        | 83.2/66.6        | 84.4/64.0        | 87.4/56.6        | 79.0/70.9        |
| Gaussian Blur     | 58.0/91.4            | 72.9/76.1        | 86.3/50.0        | 93.9/26.2        | 98.1/9.2         | 81.8/50.6        |
| Gaussian Noise    | 68.0/82.9            | 80.1/63.4        | 93.3/27.2        | 98.6/6.1         | 99.8/0.9         | 88.0/36.1        |
| Glass Blur        | 71.8/80.4            | 83.1/59.6        | 94.9/22.6        | 97.0/14.0        | 98.4/7.3         | 89.0/36.8        |
| Impulse Noise     | 72.9/75.6            | 83.5/57.3        | 90.9/36.1        | 98.5/6.6         | 99.8/0.8         | 89.1/35.3        |
| JPEG Compression  | 60.0/92.3            | 62.3/91.6        | 64.0/90.7        | 69.3/87.1        | 76.2/78.8        | 66.4/88.1        |
| Motion Blur       | 62.4/88.6            | 73.6/75.8        | 86.6/48.3        | 94.7/21.9        | 97.0/13.0        | 82.9/49.5        |
| Pixelate          | 61.5/91.1            | 67.2/86.7        | 76.1/73.3        | 90.2/37.2        | 94.2/22.3        | 77.9/62.1        |
| Saturate          | 55.0/94.0            | 56.0/93.4        | 55.8/92.4        | 65.3/86.6        | 73.0/78.4        | 61.0/89.0        |
| Shot Noise        | 68.7/82.5            | 82.1/59.6        | 93.1/28.3        | 98.7/6.0         | 99.6/1.8         | 88.4/35.6        |
| Snow              | 71.7/80.7            | 85.4/59.1        | 82.6/65.2        | 88.1/52.1        | 90.5/45.6        | 83.7/60.5        |
| Spatter           | 55.4/92.7            | 69.2/82.3        | 76.1/77.2        | 81.1/66.8        | 85.8/60.1        | 73.5/75.8        |
| Speckle Noise     | 64.8/87.2            | 70.7/80.6        | 86.1/50.9        | 91.9/33.2        | 96.0/18.0        | 81.9/54.0        |
| Zoom Blur         | 74.0/76.5            | 81.5/63.6        | 86.1/53.6        | 89.4/43.9        | 91.8/36.0        | 84.6/54.7        |
| <b>Average</b>    | <b>63.3/87.3</b>     | <b>72.0/76.5</b> | <b>79.1/61.9</b> | <b>85.8/46.5</b> | <b>90.5/34.9</b> | <b>78.1/61.4</b> |

## G.6. RankFeat (ResNetv2-101)

The performance achieved by RankFeat in Table 13 is significantly superior to that achieved by the other baseline

methods. Nevertheless, it remains inferior to DisCoPatch in terms of Covariate Shift OOD detection abilities.

Table 13. Covariate shift OOD benchmark for RankFeat.

| Corruption        | Corruption Intensity |                  |                  |                  |                  | Average          |
|-------------------|----------------------|------------------|------------------|------------------|------------------|------------------|
|                   | 1                    | 2                | 3                | 4                | 5                |                  |
| Brightness        | 80.9/67.3            | 82.6/64.2        | 84.7/60.0        | 87.1/54.5        | 89.6/47.9        | 85.0/58.8        |
| Contrast          | 83.2/63.4            | 84.7/60.6        | 87.3/54.9        | 92.8/37.6        | 97.4/14.3        | 89.1/46.1        |
| Defocus Blur      | 88.1/52.9            | 90.4/46.5        | 93.0/39.4        | 94.7/31.6        | 96.1/23.7        | 92.5/38.8        |
| Elastic Transform | 84.0/61.8            | 87.6/56.2        | 88.7/44.3        | 90.8/37.9        | 95.4/22.1        | 89.3/44.4        |
| Fog               | 85.1/60.3            | 86.8/56.8        | 89.3/50.9        | 90.8/46.0        | 93.6/33.9        | 89.1/49.6        |
| Frost             | 89.1/43.6            | 94.2/25.2        | 96.4/16.2        | 96.7/14.9        | 97.6/10.8        | 94.8/22.1        |
| Gaussian Blur     | 83.7/62.6            | 89.1/51.0        | 91.9/43.8        | 93.7/38.0        | 96.3/22.3        | 91.0/43.5        |
| Gaussian Noise    | 87.8/52.3            | 91.1/42.2        | 94.4/28.8        | 96.9/15.8        | 98.7/5.4         | 93.8/28.9        |
| Glass Blur        | 90.9/38.7            | 93.9/27.9        | 97.1/14.5        | 97.4/13.4        | 97.0/16.9        | 95.3/22.3        |
| Impulse Noise     | 94.0/31.3            | 95.4/24.9        | 96.2/20.2        | 97.7/11.2        | 98.8/4.7         | 96.4/18.5        |
| JPEG Compression  | 84.7/61.7            | 86.6/57.9        | 87.9/55.0        | 91.1/45.8        | 93.5/37.1        | 88.7/51.5        |
| Motion Blur       | 84.9/59.0            | 88.5/50.5        | 92.7/37.9        | 96.0/22.7        | 97.4/14.6        | 91.9/36.9        |
| Pixelate          | 84.6/62.3            | 85.2/62.8        | 90.4/48.3        | 95.4/26.3        | 97.5/12.9        | 90.6/42.5        |
| Saturate          | 81.4/67.6            | 81.2/68.8        | 82.6/64.9        | 88.4/52.1        | 91.1/43.4        | 84.9/59.3        |
| Shot Noise        | 88.2/50.4            | 91.7/39.1        | 94.5/27.4        | 97.3/13.1        | 98.5/6.7         | 94.0/27.3        |
| Snow              | 90.8/43.2            | 95.4/21.7        | 94.4/28.4        | 96.2/19.8        | 97.2/14.0        | 94.8/25.4        |
| Spatter           | 81.5/67.1            | 86.1/60.1        | 90.7/46.0        | 93.1/36.9        | 95.3/25.3        | 89.4/47.2        |
| Speckle Noise     | 87.2/52.4            | 89.2/46.7        | 93.4/31.8        | 95.0/24.9        | 96.4/18.0        | 92.2/34.8        |
| Zoom Blur         | 88.7/51.1            | 91.1/44.5        | 93.0/37.0        | 94.2/32.1        | 95.5/25.6        | 92.5/38.1        |
| <b>Average</b>    | <b>86.3/55.2</b>     | <b>89.0/47.8</b> | <b>91.5/39.5</b> | <b>94.0/30.2</b> | <b>95.9/21.0</b> | <b>91.3/38.7</b> |

## G.7. ASH (ResNet-50)

The behavior observed for ASH in Table 14 is very similar to the one observed in SCALE, which uses a similar backbone.

Table 14. Covariate shift OOD benchmark for ASH.

| Corruption        | Corruption Intensity |                  |                  |                  |                  | Average          |
|-------------------|----------------------|------------------|------------------|------------------|------------------|------------------|
|                   | 1                    | 2                | 3                | 4                | 5                |                  |
| Brightness        | 64.6/86.9            | 65.5/85.3        | 67.9/82.6        | 71.9/77.5        | 77.1/69.7        | 69.4/80.4        |
| Contrast          | 79.2/68.6            | 84.7/57.4        | 92.2/35.9        | 99.0/4.9         | 100.0/0.1        | 91.0/33.4        |
| Defocus Blur      | 83.4/60.8            | 88.1/48.2        | 94.3/27.0        | 97.2/14.1        | 98.7/6.4         | 92.4/31.3        |
| Elastic Transform | 72.0/79.4            | 79.1/69.9        | 81.8/65.5        | 87.6/52.7        | 95.2/27.6        | 83.1/59.0        |
| Fog               | 75.5/72.8            | 86.9/50.3        | 92.5/34.0        | 93.2/41.6        | 95.3/23.1        | 88.7/44.4        |
| Frost             | 75.5/72.8            | 86.9/50.3        | 92.5/34.0        | 93.2/31.6        | 95.3/23.1        | 88.7/42.4        |
| Gaussian Blur     | 75.7/75.1            | 86.4/53.4        | 92.9/33.5        | 96.4/18.5        | 99.2/4.0         | 90.1/36.9        |
| Gaussian Noise    | 70.4/79.3            | 77.8/69.9        | 88.1/48.5        | 95.7/21.7        | 99.1/3.9         | 86.2/44.7        |
| Glass Blur        | 82.0/64.8            | 89.0/46.7        | 96.3/18.8        | 97.6/12.3        | 98.7/6.5         | 92.7/29.8        |
| Impulse Noise     | 77.0/71.6            | 83.4/60.6        | 88.4/48.1        | 96.1/20.1        | 99.1/4.2         | 88.8/40.9        |
| JPEG Compression  | 71.8/80.6            | 73.8/77.7        | 75.4/75.3        | 80.8/65.3        | 87.9/48.7        | 77.9/69.5        |
| Motion Blur       | 75.8/72.7            | 82.7/59.5        | 90.8/38.4        | 96.2/18.6        | 98.0/10.0        | 88.7/39.8        |
| Pixelate          | 68.7/84.1            | 70.2/82.3        | 78.7/70.5        | 88.5/48.5        | 93.1/32.6        | 79.9/63.6        |
| Saturate          | 68.4/83.8            | 69.2/81.3        | 66.0/85.7        | 72.9/78.4        | 80.5/67.6        | 71.4/79.4        |
| Shot Noise        | 71.1/78.9            | 79.8/66.9        | 88.7/47.3        | 96.5/18.3        | 98.6/7.0         | 86.9/43.7        |
| Snow              | 75.1/75.3            | 89.4/45.0        | 86.1/52.7        | 92.1/34.9        | 95.5/21.9        | 87.6/45.9        |
| Spatter           | 64.8/87.3            | 71.5/82.1        | 79.5/72.9        | 80.5/70.6        | 86.9/58.3        | 76.6/74.2        |
| Speckle Noise     | 69.3/81.5            | 72.9/77.4        | 84.8/57.9        | 90.1/44.1        | 94.2/28.8        | 82.3/57.9        |
| Zoom Blur         | 78.8/72.6            | 83.4/64.9        | 87.0/56.2        | 89.8/48.7        | 92.0/41.1        | 86.2/56.7        |
| <b>Average</b>    | <b>73.6/76.2</b>     | <b>80.0/64.7</b> | <b>85.5/51.8</b> | <b>90.3/38.0</b> | <b>93.9/25.5</b> | <b>84.7/51.3</b> |

## G.8. FDBD (ResNet-50)

The behavior of FDBD presented in Table 15 is analogous to that seen in SCALE and ASH, with the three sharing the same backbone.

Table 15. Covariate shift OOD benchmark for FDBD.

| Corruption        | Corruption Intensity |           |           |           |           | Average   |
|-------------------|----------------------|-----------|-----------|-----------|-----------|-----------|
|                   | 1                    | 2         | 3         | 4         | 5         |           |
| Brightness        | 62.1/89.2            | 62.7/88.5 | 64.4/86.6 | 67.8/83.3 | 72.7/77.6 | 65.9/85.0 |
| Contrast          | 76.1/75.0            | 81.7/65.5 | 89.6/46.1 | 98.2/10.0 | 99.9/0.3  | 89.1/39.4 |
| Defocus Blur      | 79.2/70.9            | 84.0/61.1 | 91.2/40.6 | 95.2/24.8 | 97.6/13.2 | 89.4/42.1 |
| Elastic Transform | 67.2/85.1            | 74.2/76.1 | 76.9/72.7 | 83.3/61.3 | 93.1/37.4 | 79.0/66.5 |
| Fog               | 71.8/80.6            | 75.2/76.5 | 79.7/69.6 | 83.1/62.2 | 91.0/41.7 | 80.1/66.1 |
| Frost             | 71.3/79.0            | 83.6/59.4 | 90.0/43.2 | 90.9/40.3 | 93.6/30.8 | 85.9/50.5 |
| Gaussian Blur     | 72.2/81.0            | 82.4/65.0 | 90.2/45.2 | 94.7/27.6 | 98.5/7.5  | 87.6/45.3 |
| Gaussian Noise    | 71.4/80.5            | 79.2/70.2 | 88.5/49.9 | 95.5/24.1 | 99.0/4.7  | 86.7/45.9 |
| Glass Blur        | 77.8/72.5            | 85.0/57.3 | 94.0/28.0 | 95.7/20.9 | 97.3/13.6 | 90.0/38.4 |
| Impulse Noise     | 76.4/74.2            | 83.5/63.2 | 88.4/50.9 | 95.8/22.8 | 98.9/5.1  | 88.6/43.3 |
| JPEG Compression  | 70.8/83.0            | 72.9/80.3 | 74.4/78.2 | 79.2/70.6 | 85.6/56.9 | 76.6/73.8 |
| Motion Blur       | 71.2/79.6            | 78.1/68.6 | 87.7/47.9 | 94.6/25.9 | 97.0/15.2 | 85.7/47.4 |
| Pixelate          | 69.0/85.5            | 70.7/83.7 | 78.6/73.9 | 87.3/55.0 | 91.7/40.2 | 79.5/67.7 |
| Saturate          | 65.1/86.7            | 66.5/84.6 | 62.3/89.2 | 69.1/83.4 | 78.1/72.5 | 68.2/83.3 |
| Shot Noise        | 70.7/80.9            | 79.9/68.8 | 88.6/49.7 | 96.2/20.4 | 98.4/8.0  | 86.8/45.5 |
| Snow              | 72.9/78.5            | 88.0/50.4 | 84.5/57.6 | 90.8/40.8 | 94.4/27.8 | 86.1/51.0 |
| Spatter           | 61.9/89.7            | 68.6/84.6 | 77.7/75.2 | 78.7/72.6 | 85.9/60.2 | 74.6/76.5 |
| Speckle Noise     | 66.7/84.3            | 70.9/80.3 | 83.7/61.5 | 89.2/47.9 | 93.6/32.3 | 80.8/61.3 |
| Zoom Blur         | 72.9/81.1            | 77.5/76.0 | 81.5/69.6 | 84.8/63.7 | 87.6/56.7 | 80.9/69.4 |
| <b>Average</b>    | 70.9/80.9            | 77.1/71.6 | 82.7/59.8 | 87.9/45.1 | 92.3/31.7 | 82.2/57.8 |

## G.9. DisCoPatch

As seen in Table 16, DisCoPatch excels at detecting every sort of corruption at each possible intensity on ImageNet-1K.

Table 16. Covariate shift OOD benchmark for DisCoPatch-64.

| Corruption        | Corruption Intensity |           |           |           |           | Average   |
|-------------------|----------------------|-----------|-----------|-----------|-----------|-----------|
|                   | 1                    | 2         | 3         | 4         | 5         |           |
| Brightness        | 91.4/37.2            | 91.7/34.0 | 92.7/29.5 | 93.9/24.4 | 94.8/21.4 | 92.9/29.3 |
| Contrast          | 95.3/21.9            | 96.4/16.9 | 97.4/12.3 | 97.6/12.4 | 96.9/17.8 | 96.7/16.2 |
| Defocus Blur      | 98.7/5.1             | 98.8/4.5  | 99.0/3.9  | 99.0/3.7  | 99.0/3.6  | 98.9/4.1  |
| Elastic Transform | 96.9/13.3            | 96.6/14.7 | 98.22/7.0 | 98.4/6.1  | 98.4/5.7  | 97.7/9.4  |
| Fog               | 98.2/7.9             | 98.9/4.5  | 99.4/2.2  | 99.5/1.6  | 99.7/0.7  | 99.2/3.4  |
| Frost             | 95.9/16.3            | 98.1/7.2  | 98.7/4.8  | 98.9/4.1  | 99.1/3.3  | 98.2/7.1  |
| Gaussian Blur     | 98.3/7.0             | 98.8/4.4  | 99.0/3.8  | 99.0/3.6  | 99.1/3.5  | 98.8/4.5  |
| Gaussian Noise    | 99.8/0.3             | 99.8/0.3  | 99.8/0.3  | 99.8/0.3  | 99.8/0.3  | 99.8/0.3  |
| Glass Blur        | 98.9/4.2             | 99.2/2.8  | 99.5/1.6  | 99.5/1.4  | 99.5/1.4  | 99.3/2.3  |
| Impulse Noise     | 99.8/0.5             | 99.8/0.3  | 99.8/0.3  | 99.8/0.3  | 99.8/0.3  | 99.8/0.4  |
| JPEG Compression  | 83.6/55.4            | 83.1/54.0 | 82.9/53.4 | 81.2/53.6 | 78.1/56.9 | 81.8/54.7 |
| Motion Blur       | 97.9/8.7             | 98.5/6.1  | 98.9/4.4  | 99.1/3.5  | 99.2/3.1  | 98.7/5.2  |
| Pixelate          | 95.9/17.8            | 96.3/16.0 | 96.8/13.6 | 97.2/11.8 | 96.9/12.4 | 96.6/14.3 |
| Saturate          | 95.8/18.6            | 98.5/6.2  | 93.7/29.5 | 96.4/16.0 | 97.4/11.1 | 96.3/16.3 |
| Shot Noise        | 99.7/0.7             | 99.8/0.3  | 99.8/0.3  | 99.8/0.3  | 99.8/0.3  | 99.8/0.4  |
| Snow              | 96.1/14.8            | 98.4/6.0  | 97.4/9.3  | 98.1/6.5  | 98.3/6.3  | 97.7/8.6  |
| Spatter           | 93.0/31.3            | 95.1/19.3 | 97.3/9.9  | 94.8/17.7 | 96.6/11.2 | 95.3/17.9 |
| Speckle Noise     | 99.5/2.0             | 99.6/1.4  | 99.6/1.6  | 99.5/1.7  | 99.6/1.6  | 99.5/1.6  |
| Zoom Blur         | 98.4/6.7             | 98.6/5.3  | 98.8/4.5  | 98.9/4.1  | 99.0/3.7  | 98.8/4.9  |
| <b>Average</b>    | 96.5/14.2            | 97.2/10.8 | 97.3/10.1 | 97.4/9.1  | 97.4/8.7  | 97.2/10.6 |
